# Supplementary material for: Enhanced high temperature thermoelectric response of sulphuric acid treated conducting polymer thin films
Source: Royal Society of Chemistry journal article supplement (doi:10.1039/c5tc03145a), 2015-11-24
Supplement: c5tc03145a1.pdf [file c5tc03145a1.pdf]

## Electronic Supplementary Information

### Enhanced high temperature thermoelectric response of sulphuric acid treated conducting polymer thin films

S.R. Sarath Kumar,<sup>\*</sup> Narendra Kurra,<sup>\*</sup> and H.N. Alshareef<sup>†</sup>

*Materials Science and Engineering, King Abdullah University of Science and Technology (KAUST),  
Thuwal-23955-6900, Saudi Arabia.*

Corresponding author: [husam.alshareef@kaust.edu.sa](mailto:husam.alshareef@kaust.edu.sa)

<sup>\*</sup> These authors contributed equally to the work.

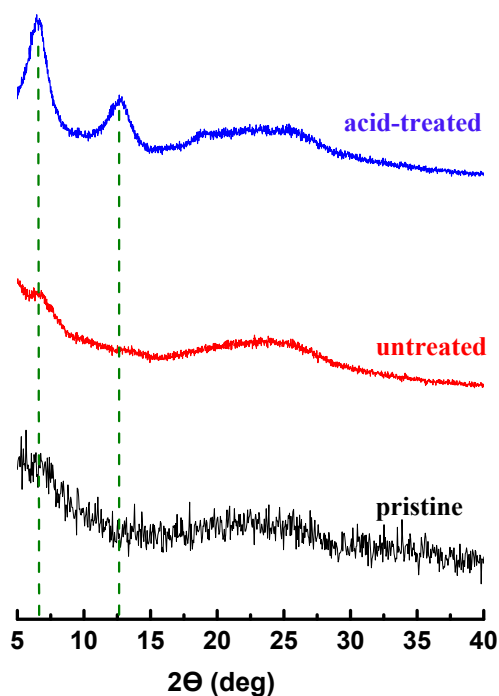

**Fig. S1.** XRD patterns of pristine, untreated and acid-treated PEDOT:PSS films.

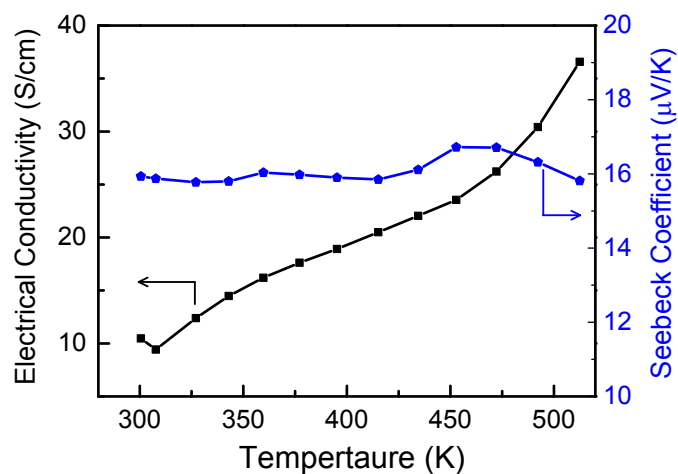

**Fig. S2.** Temperature dependence of electrical conductivity and Seebeck coefficient of pristine PEDOT:PSS film. Electrical conductivity is very low and the film exhibits semiconducting nature, with electrical conductivity increasing with temperature. The Seebeck coefficient is nearly temperature independent, with variation ( $< 1 \mu\text{V/K}$ ) well within the resolution of the Seebeck tester.
